# Supplementary material for: PHF24 is expressed in the inhibitory interneurons in rats
Source: PubMed Central journal article supplement — Exp Anim. 2020 Oct 29;70(1):137–43. doi: 10.1538/expanim.20-0105 (PMC7887615; doi:10.1538/expanim.20-0105), 2020-10-29
Supplement: expanim-70-137-s001.pdf [file expanim-70-137-s001.pdf]

Fig. S1 Immunofluorescence for PHF24

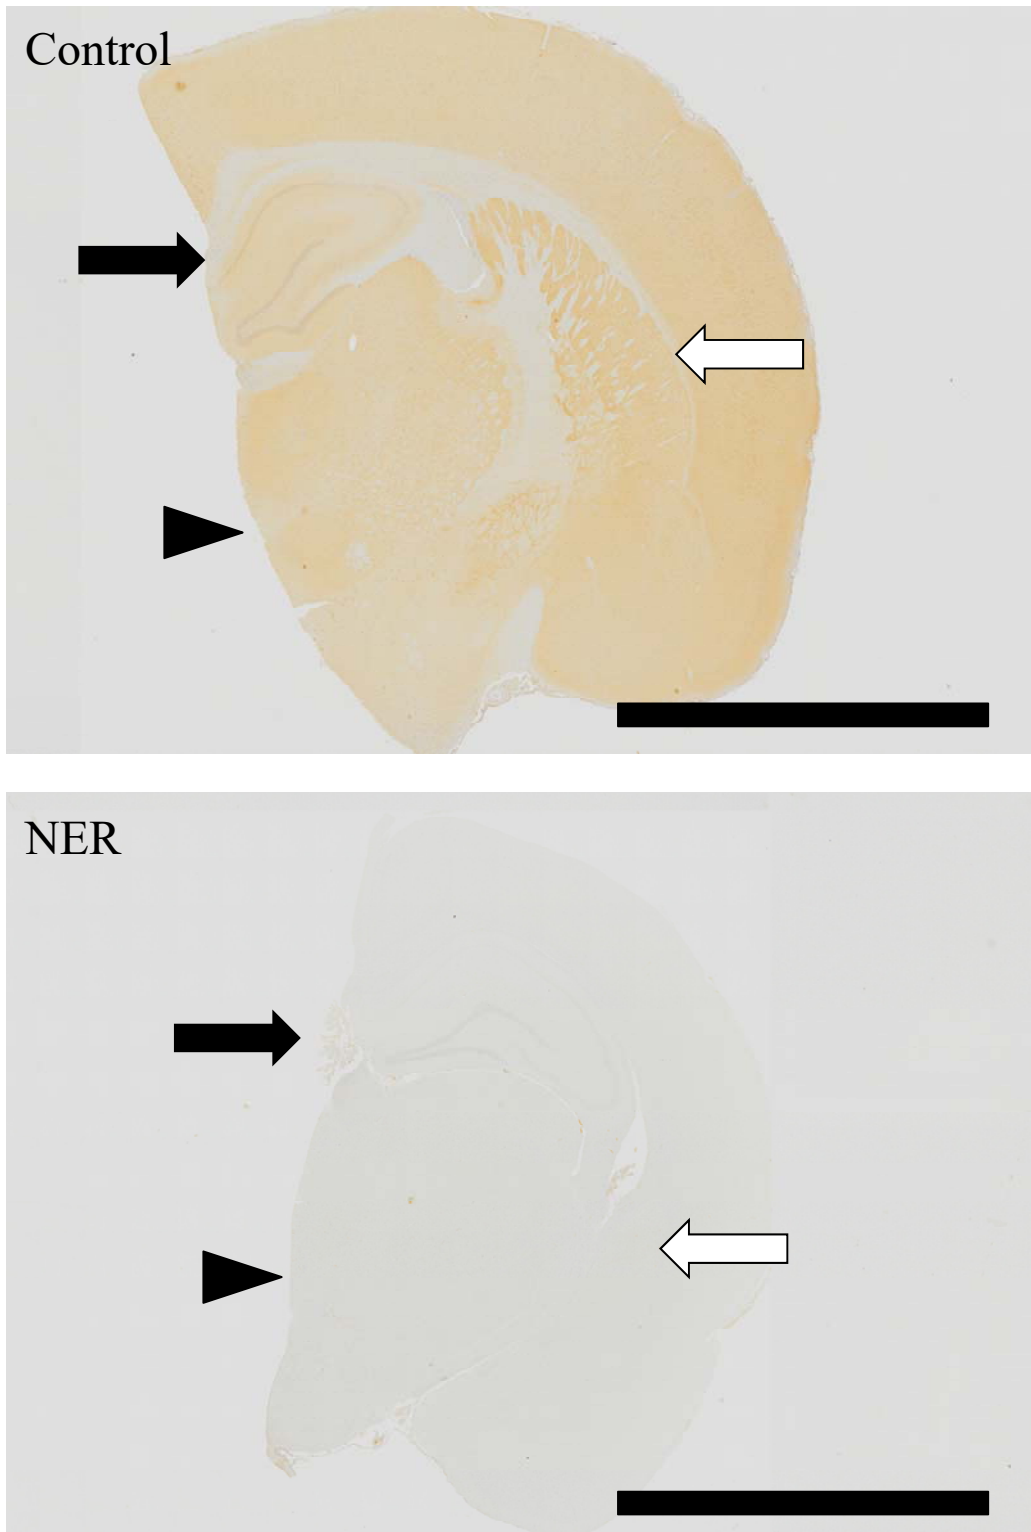

The expressions of PHF24 were observed in some areas in the CNS of control rats, while the NER showed reductions of PHF24 expressions in these areas. Black arrows: hippocampus While arrows: striatum Black arrowheads: thalamus Black bar: 5 mm

Fig. S2 Double immunofluorescence for PHF24 and calbindin

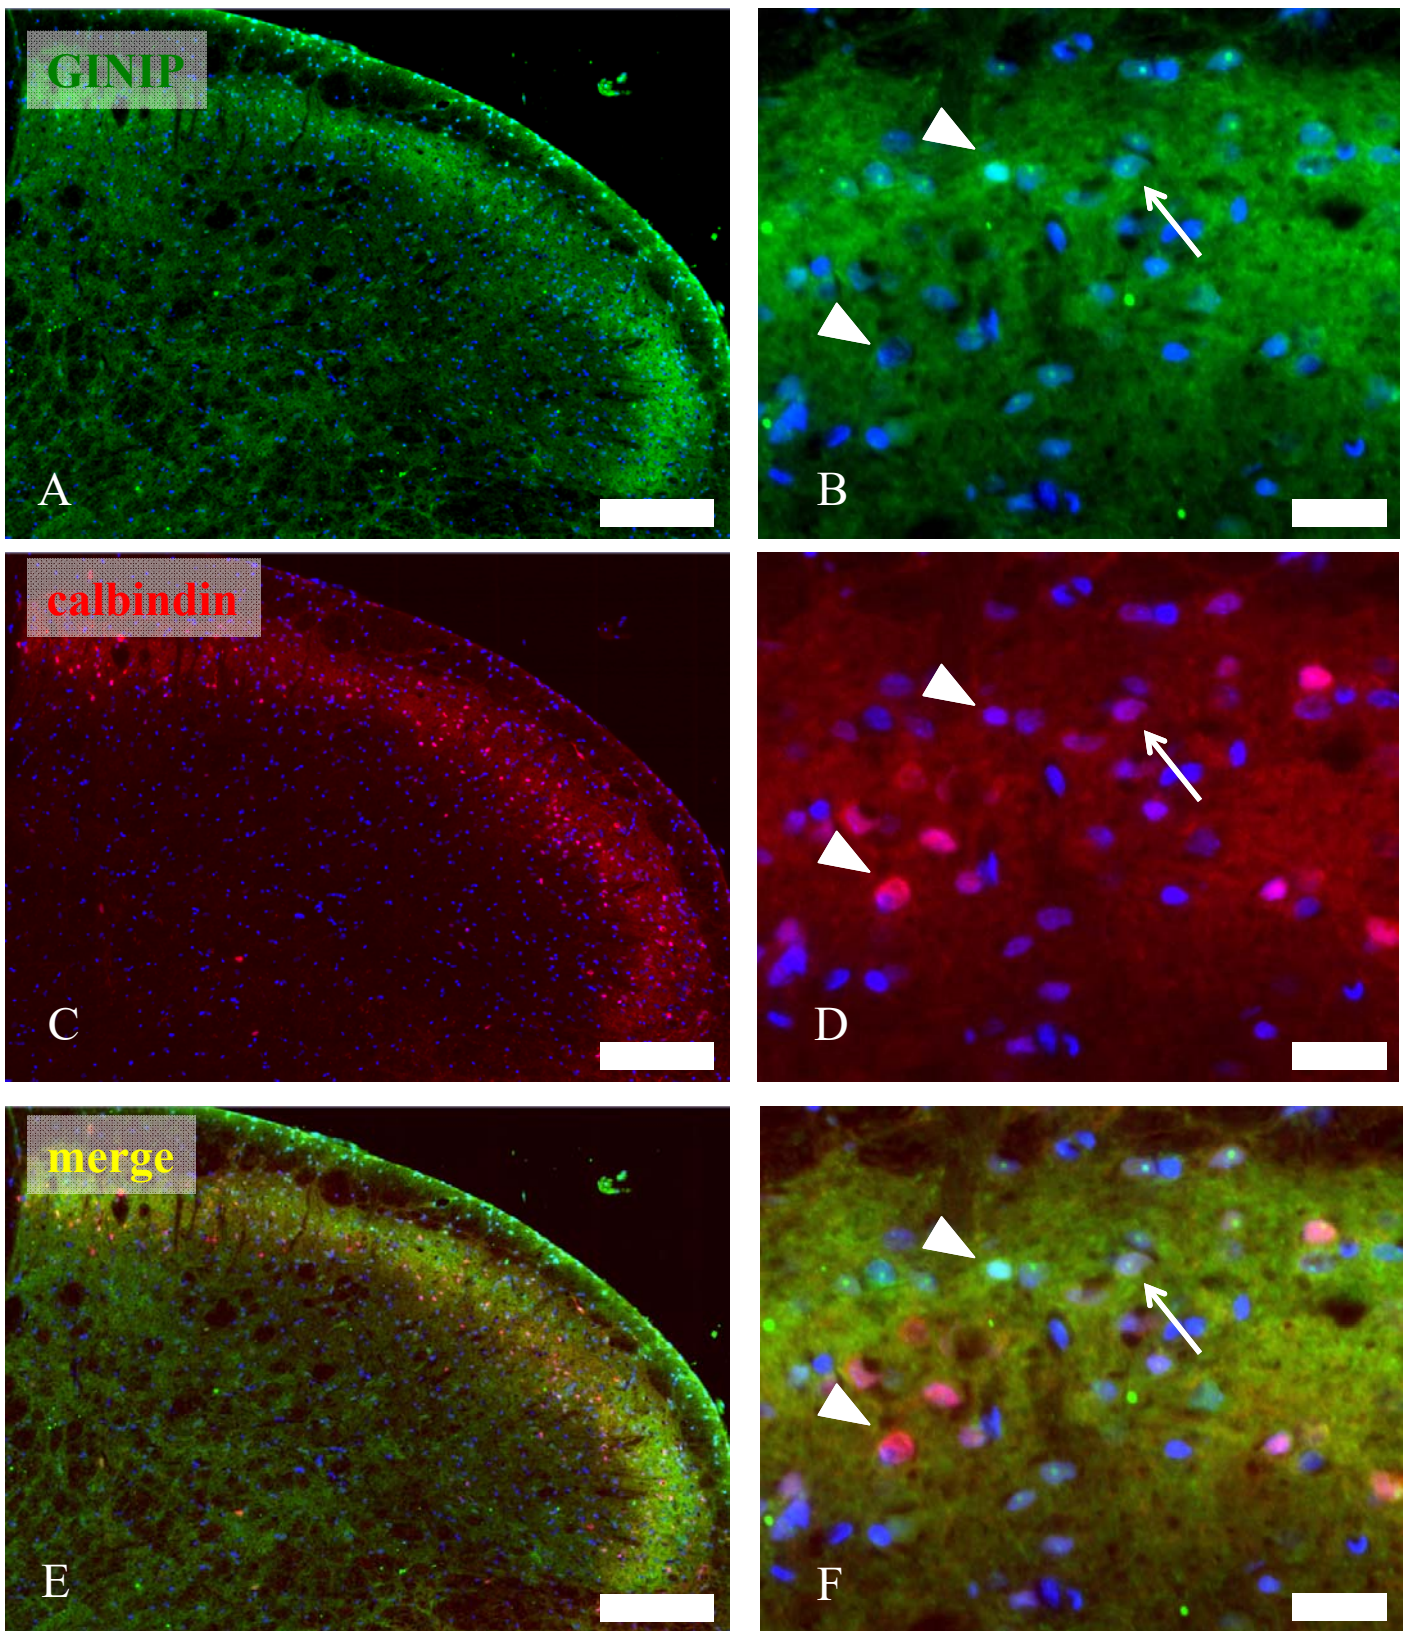

Some of PHF24-positive neurons express calbindin. Fig. B, D and F are high magnification images of lamina II. Arrows indicate co-expression. There are also single positive neurons for PHF24 or calbindin (arrowheads). Bars: 200  $\mu\text{m}$  (A, C, E), 20  $\mu\text{m}$  (B, D, F)



Fig. S2 Double immunofluorescence for PHF24 and calretinin

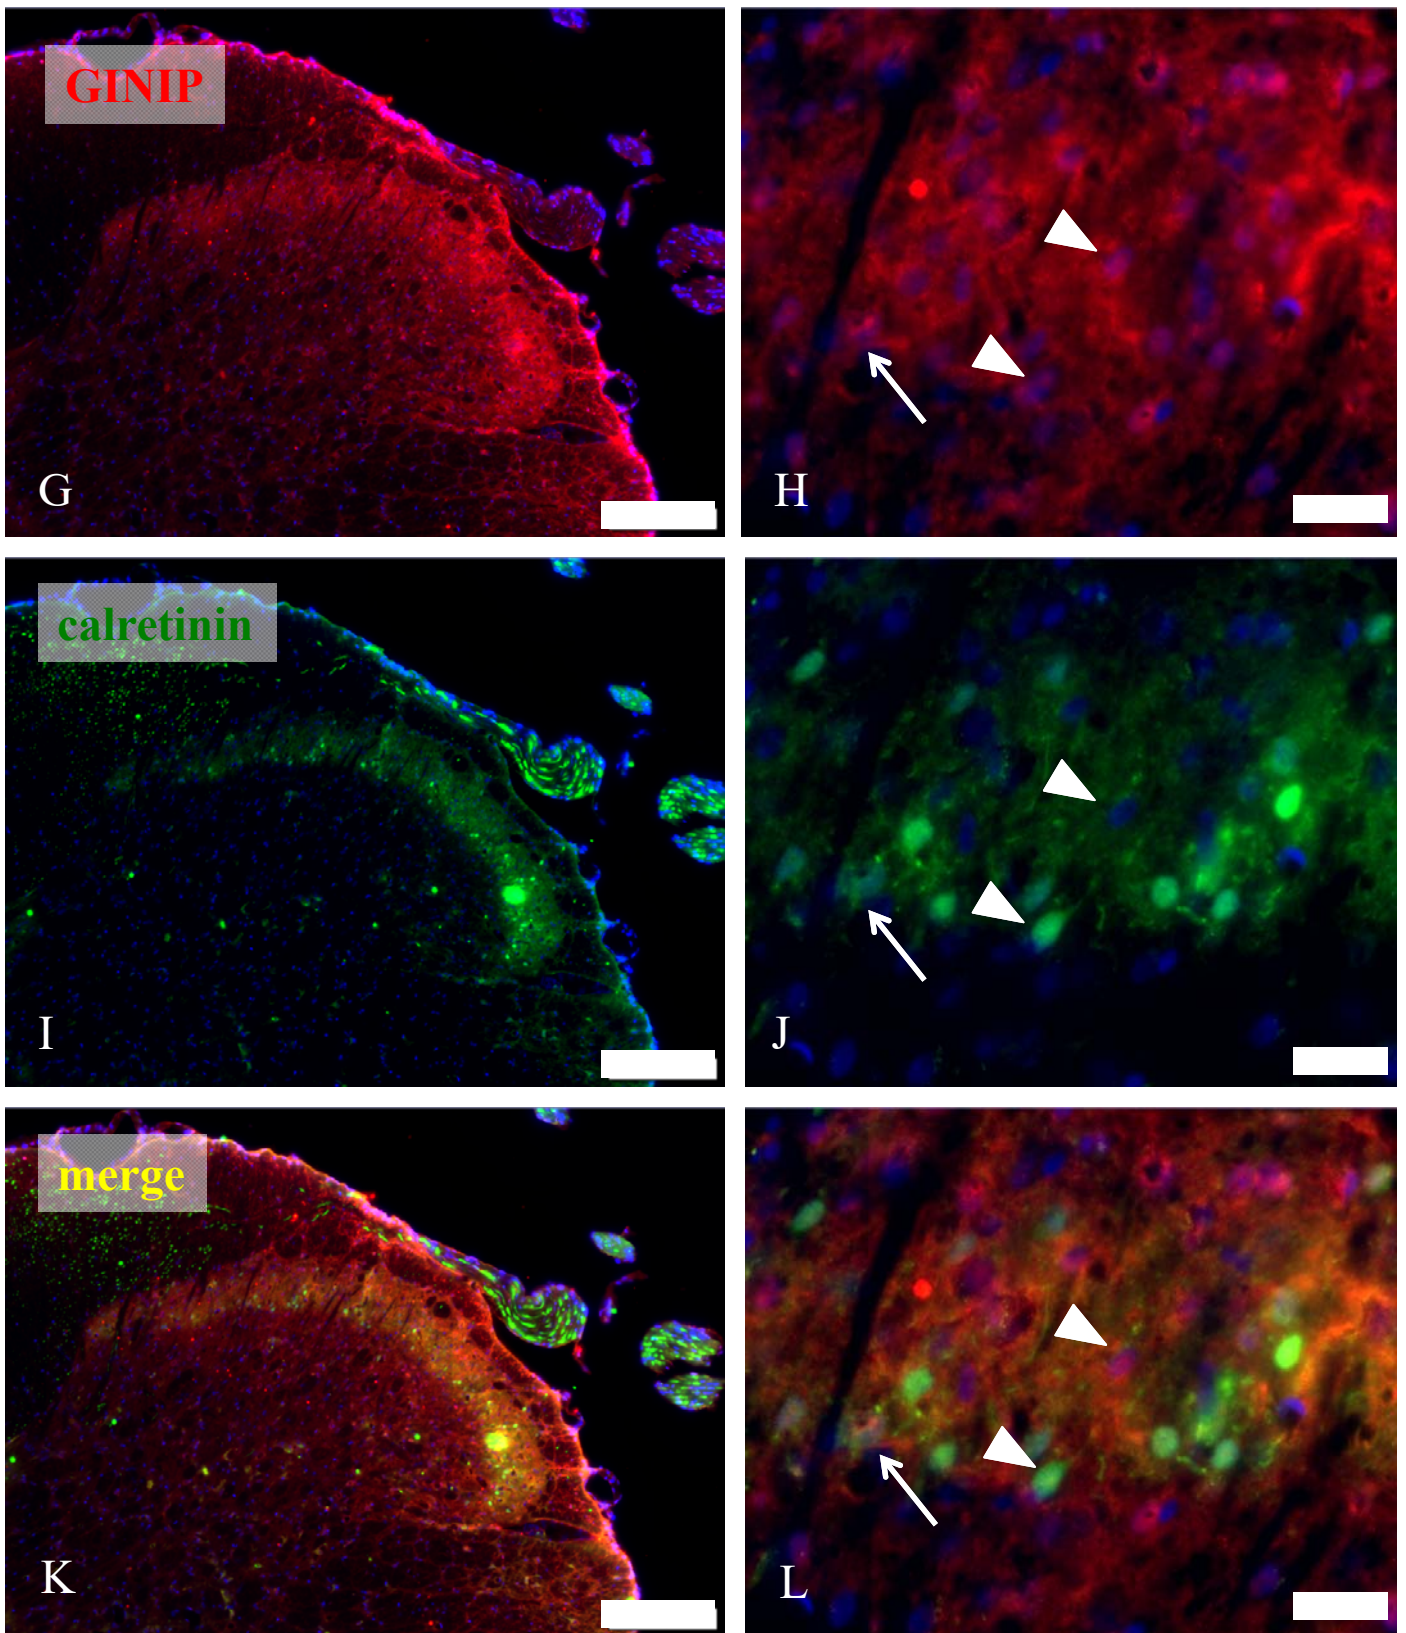

Some of PHF24-positive neurons express calretinin. Fig. H, J and L are high magnification images of lamina II. Arrows indicate co-expression. There are also single positive neurons for PHF24 or calretinin (arrowheads). Bars: 200  $\mu\text{m}$  (G, I, K), 20  $\mu\text{m}$  (H, J, L)
